# Supplementary material
Source: PubMed Central journal article supplement (PMC544904)
Supplement: 7600491s3.pdf [file 7600491s3.pdf]

## Supplementary Table 1

Oligonucleotides used in this work:

miR-30a-3p (Northern blot): 5'-GCAGCTGCAAACATCCGACTGAAAGCCC-3'

miR-30a-5p (Northern blot): 5'-AGCTTCCAGTCGAGGATGTTTAC-3'

miR-30a-3p (primer extension): 5'-TATGCAGCTGCAAACATCCGAC-3'

miR-30a-5p (primer extension): 5'-GCTTCACAGCTTCCAGTCGAGG-3'

miR-21 (Northern blot): 5'-GTCAACATCAGTCTGATAAGCTAC-3'

miR-21 (primer extension): 5'-GCTAGTCAACATCAGTCTGATA-3'

miR-27a (Northern blot): 5'-GGGGCGGAACTTAGCCACTGTGAACA-3'

miR-31 (Northern blot): 5'-AACAGCTATGCCAGCATCTTGCCTC-3'

GFP siRNA (Northern blot): 5'-GTACACAAGAACGGCATCAAGG-3'

The following oligonucleotides were used as standards (std) in primer extension experiments to determine the 5' ends of miRNAs:

miR-30a-3p std 1: 5'-CTTTCAGTCGGATGTTTGCAGC-3'

miR-30a-3p std 2: 5'-TTTCAGTCGGATGTTTGCAGC-3'

miR-30a-5p std 1: 5'-TGTAACATCCTCGACTGGAAGCT-3'

miR-30a-5p std 2: 5'-GTAAACATCCTCGACTGGAAGCT-3'
